# Supplementary material for: Significantly Reduced Alanine Aminotransferase Level Increases All-Cause Mortality Rate in the Elderly after Ischemic Stroke
Source: MDPI journal article supplement (doi:10.3390/ijerph18094915), 2021-05-05
Supplement: s1 [file s1]

**Table S1.** Univariate analysis. Hazard ratio and 95% CI for all-cause mortality, according to the selected risk factors.

|                                            | Hazard Ratio | 95% Confidence Interval |        | <i>p</i> -Value |
|--------------------------------------------|--------------|-------------------------|--------|-----------------|
|                                            |              | Lower                   | Upper  |                 |
| Age (years)                                | 1.08         | 1.04                    | 1.20   | <0.001*         |
| Sex (Reference; female)                    |              |                         |        | 0.019           |
| - Male                                     | 1.92         | 1.12                    | 3.2    |                 |
| Initial NIHSS at admission                 | 1.10         | 1.06                    | 1.14   | <0.001*         |
| Thrombolytic Treatment                     | 0.68         | 0.31                    | 1.51   | 0.343           |
| SBP at admission                           | 1.00         | 0.99                    | 1.01   | 0.392           |
| SBPV during first 24 h                     | 1.01         | 1.00                    | 1.03   | 0.125           |
| TOAST                                      |              |                         |        | 0.618           |
| - Large-artery atherosclerosis (Reference) |              |                         |        |                 |
| - Cardioembolism                           | 0.83         | 0.46                    | 1.49   | 0.522           |
| - Small-vessel occlusion                   | 0.94         | 0.45                    | 1.96   | 0.877           |
| - Stroke of other determined etiology      | 0.00         | 0.00                    | 0.00   | 0.967           |
| - Stroke of undetermined etiology          | 0.43         | 0.16                    | 1.22   | 0.113           |
| Location                                   |              |                         |        | 0.176           |
| (Reference; both site)                     |              |                         |        |                 |
| - Infratentorial                           | 2.44         | 0.73                    | 8.12   | 0.147           |
| - Supratentorial                           | 2.79         | 0.94                    | 8.26   | 0.064           |
| Hemispheric localization                   |              |                         |        | 0.031*          |
| (Reference; both side)                     |              |                         |        |                 |
| - Left                                     | 0.41         | 0.21                    | 0.81   | 0.010*          |
| - Right                                    | 0.61         | 0.31                    | 1.20   | 0.153           |
| Laboratory findings at diagnosis           |              |                         |        |                 |
| - Extremely low ALT (<10 U/L)              | 2.73         | 1.50                    | 4.98   | <0.001*         |
| - Low albumin (<3.5 g/dL)                  | 1.56         | 0.84                    | 2.92   | 0.161           |
| - Low Hb (<11 g/dL)                        | 1.17         | 0.632                   | 2.15   | 0.622           |
| - Random Glucose                           |              |                         |        | 0.044*          |
| (Reference; 3.7~7.3 mmol/L)                |              |                         |        |                 |
| - Hyperglycemia (>7.3 mmol/L)              | 0.88         | 0.49                    | 1.58   | 0.662           |
| - Hypoglycemia (<3.7 mmol/L)               | 16.05        | 1.76                    | 146.07 | 0.014*          |
| - Creatinine (mg/dL)                       | 1.59         | 1.06                    | 2.38   | 0.024*          |
| - ESR (mm/h)                               | 1.01         | 0.994                   | 1.02   | 0.412           |
| - NLR                                      | 0.97         | 0.911                   | 1.03   | 0.304           |
| - Total cholesterol (mg/dL)                | 1.00         | 1.00                    | 1.01   | 0.79            |
| BMI                                        |              |                         |        | 0.416           |
| (Reference; 18.5–24.9)                     |              |                         |        |                 |
| - Underweight (<18.5)                      | 1.57         | 0.72                    | 3.42   | 0.259           |
| - Overweight (25.0–29.9)                   | 0.71         | 0.38                    | 1.32   | 0.281           |
| - Obese (≥30)                              | 1.09         | 0.38                    | 3.17   | 0.868           |
| Atrial fibrillation                        | 0.89         | 0.50                    | 1.60   | 0.703           |
| DM                                         | 1.47         | 0.85                    | 2.54   | 0.167           |
| Hypertension                               | 01.06        | 0.64                    | 1.75   | 0.814           |
| Coronary artery occlusive disease          | 1.14         | 0.60                    | 2.16   | 0.698           |
| Cancer history                             | 0.88         | 0.33                    | 2.35   | 0.793           |
| Smoking history                            | 1.08         | 0.53                    | 2.19   | 0.828           |
| Alcohol consumption                        | 0.75         | 0.37                    | 1.53   | 0.424           |

Values, mean ± standard deviation; ALT, Alanine aminotransferase; BMI, Body Mass Index; DM, Diabetes mellitus; ESR, Erythrocyte Sedimentation Rate; Hb, Hemoglobin; NIHSS, National Institute of Health Stroke Scale; NLR, Neutrophil-Lymphocyte Ratio; SBP, Systolic Blood Pressure; SBPV, Systolic Blood Pressure Variability; TOAST, Trial of ORG 10172 in Acute Stroke Treatment; \* *p*

< 0.05.
